# Supplementary material
Source: PubMed Central journal article supplement (PMC3145339)
Supplement: NIHMS312711-supplement-Supp.pdf [file NIHMS312711-supplement-Supp.pdf]

Figure S1: Montages of J0121::GFP expression

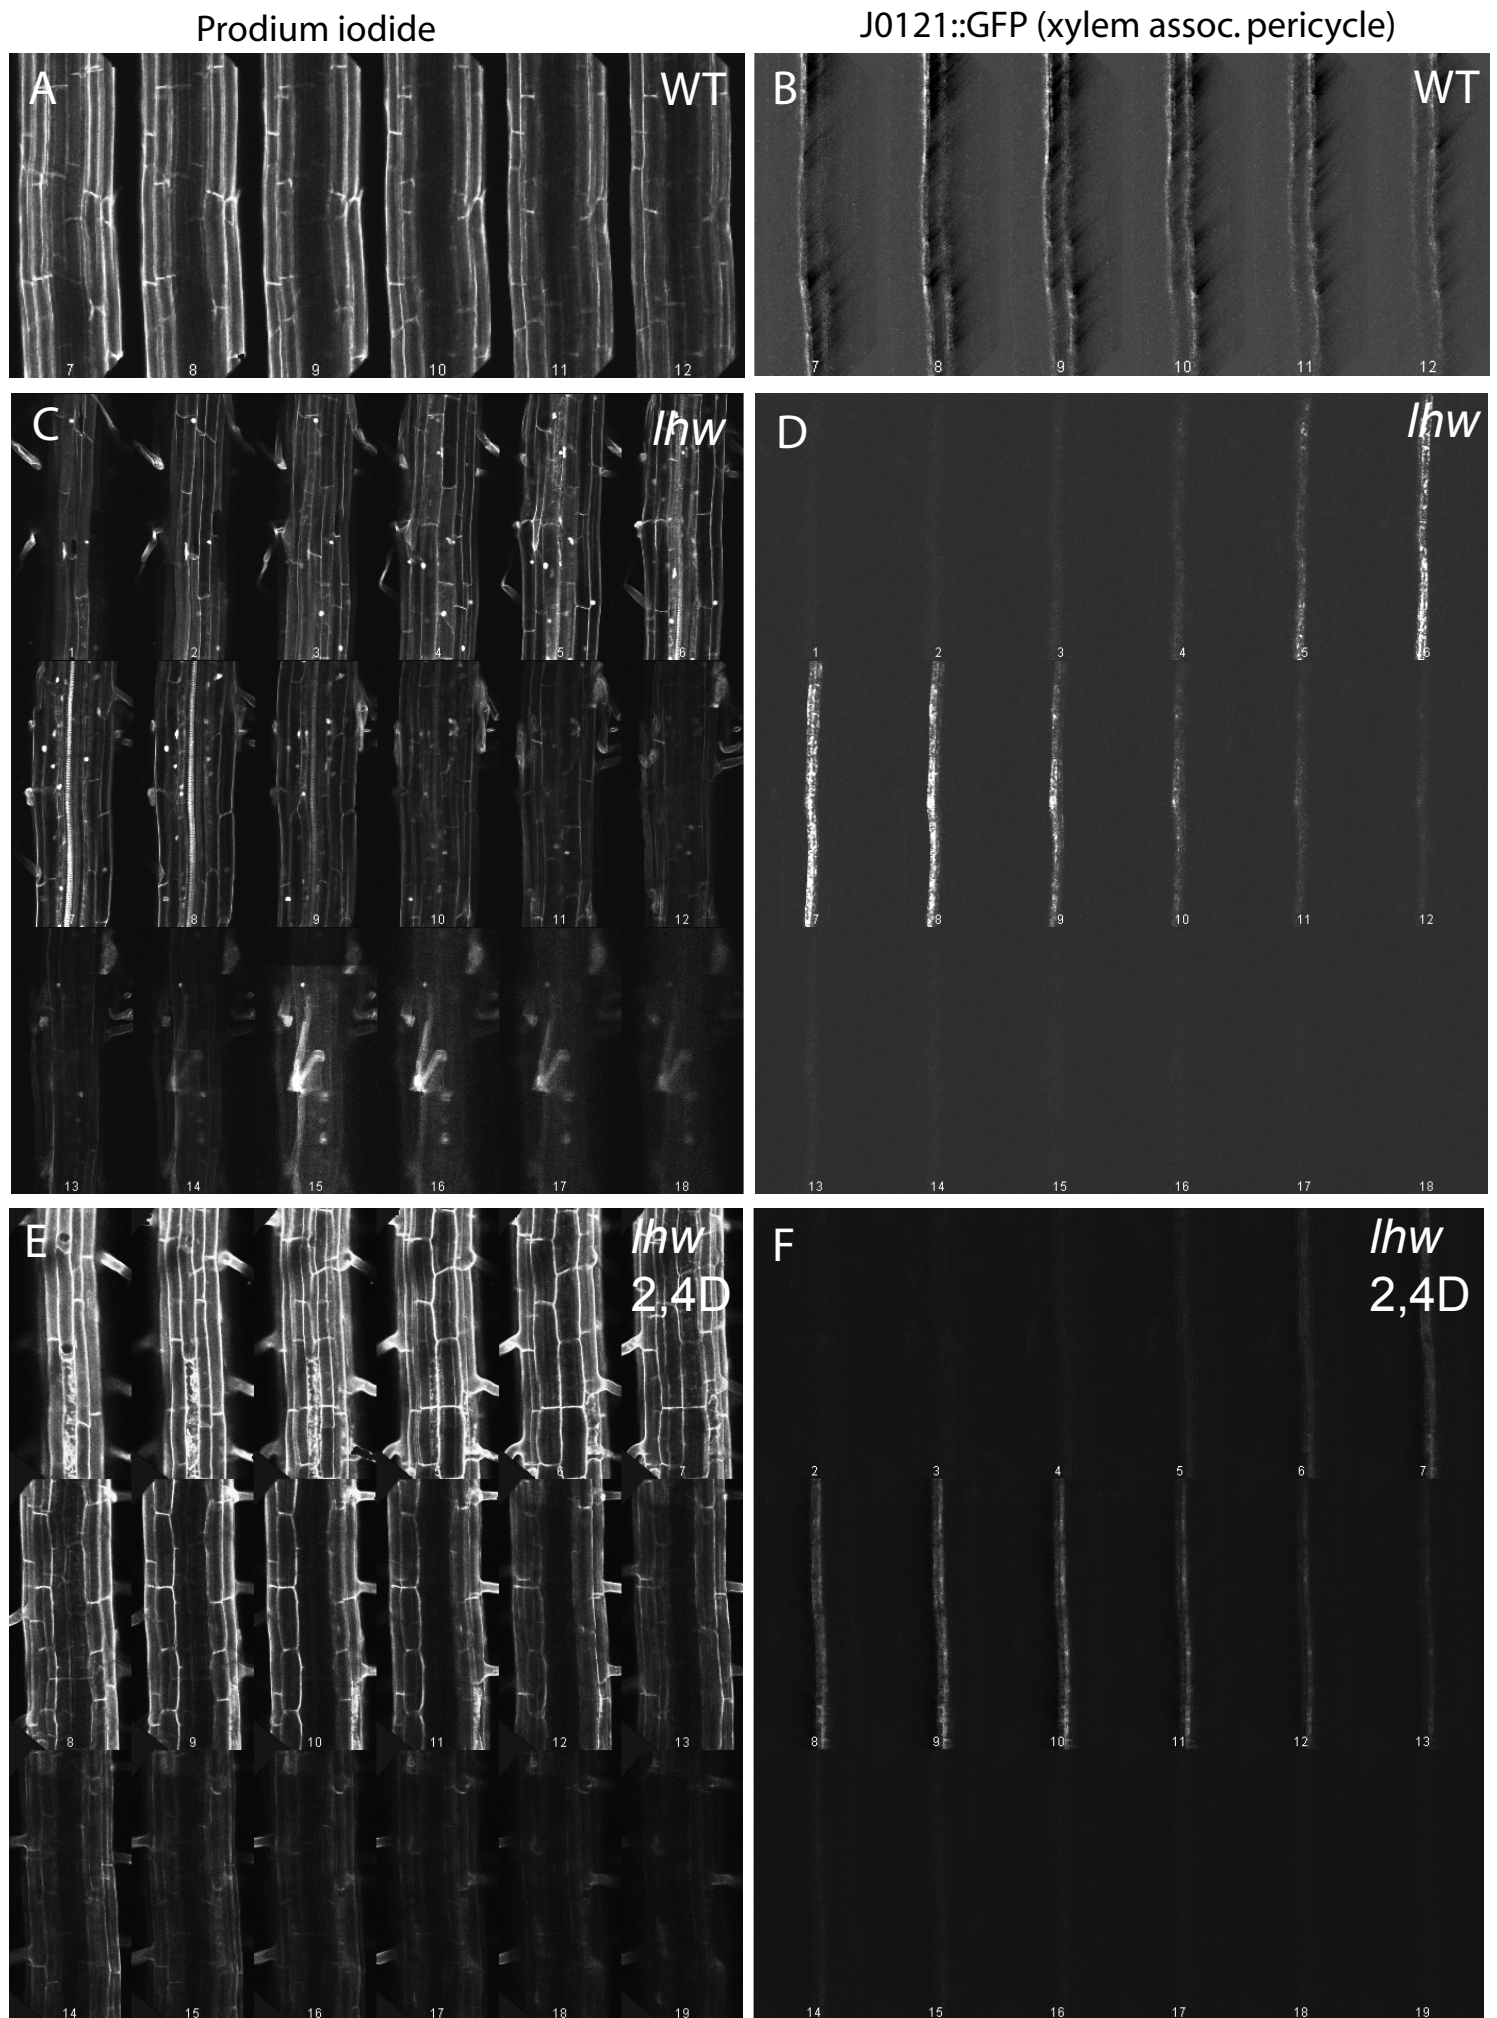

Supplemental Figure 2

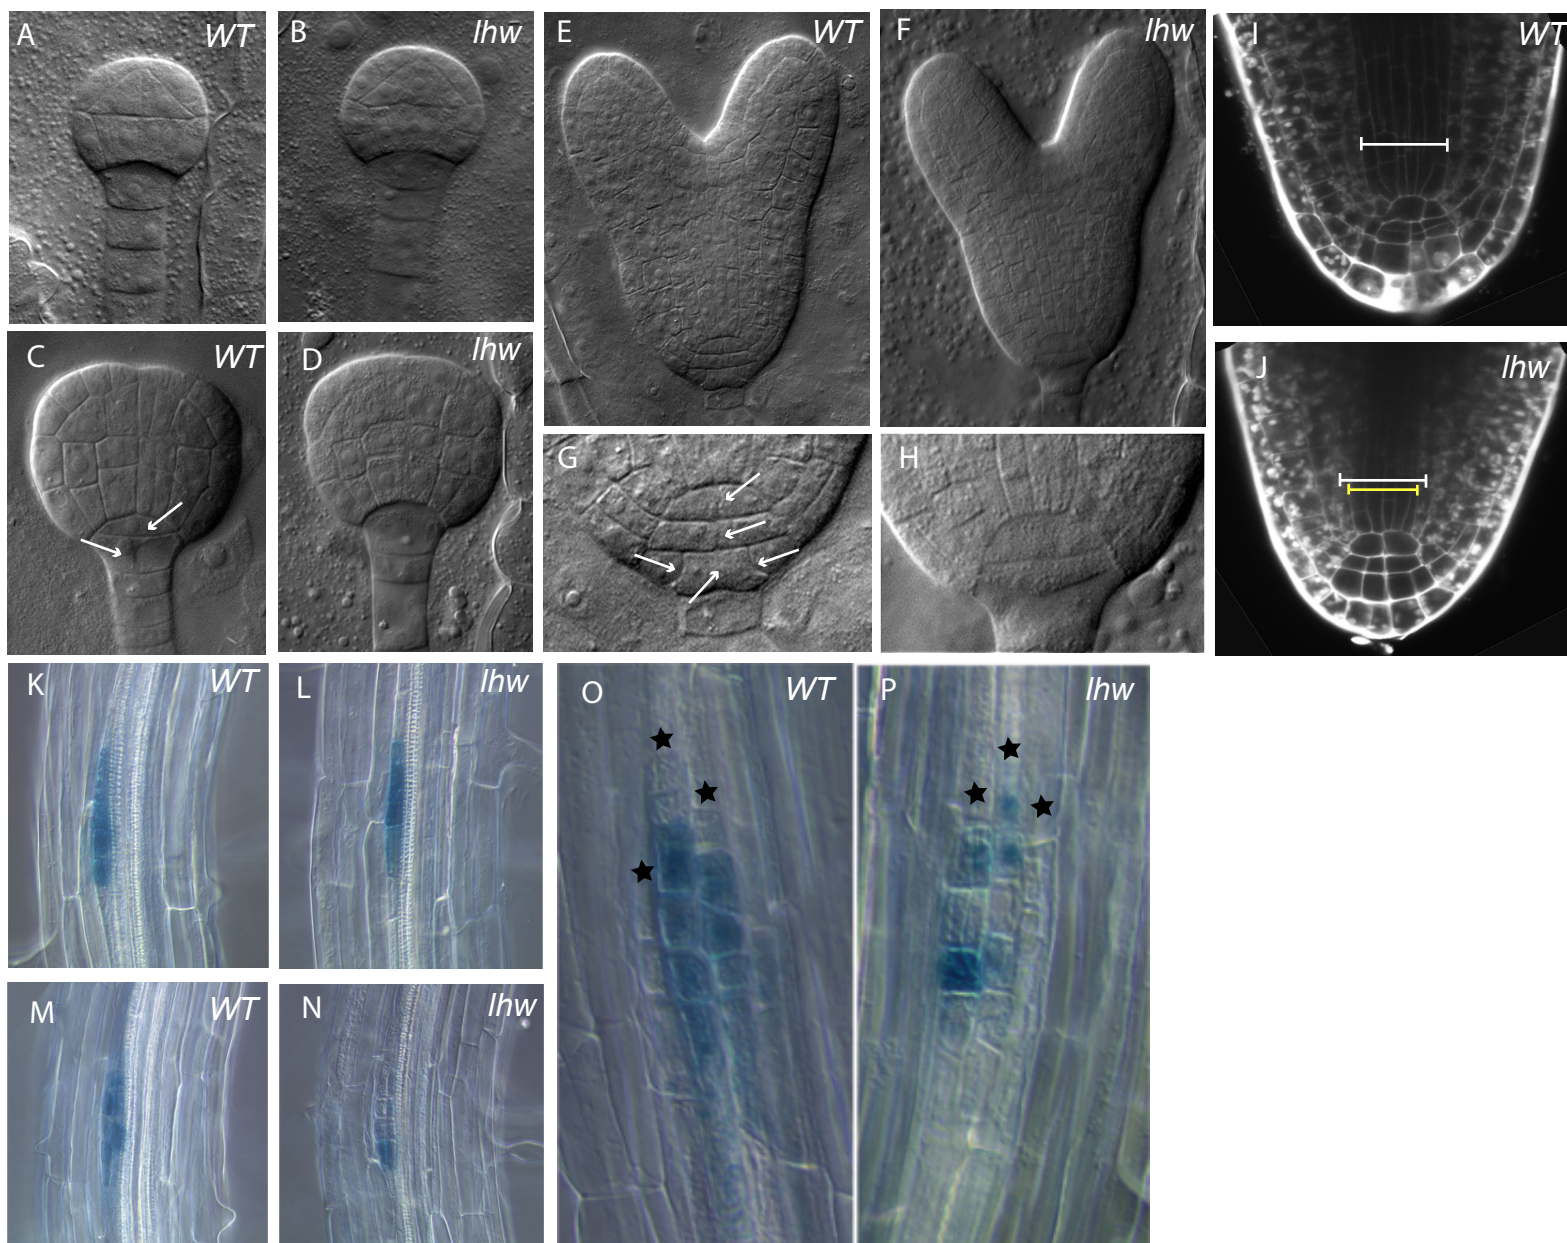

Supplemental Figure 3

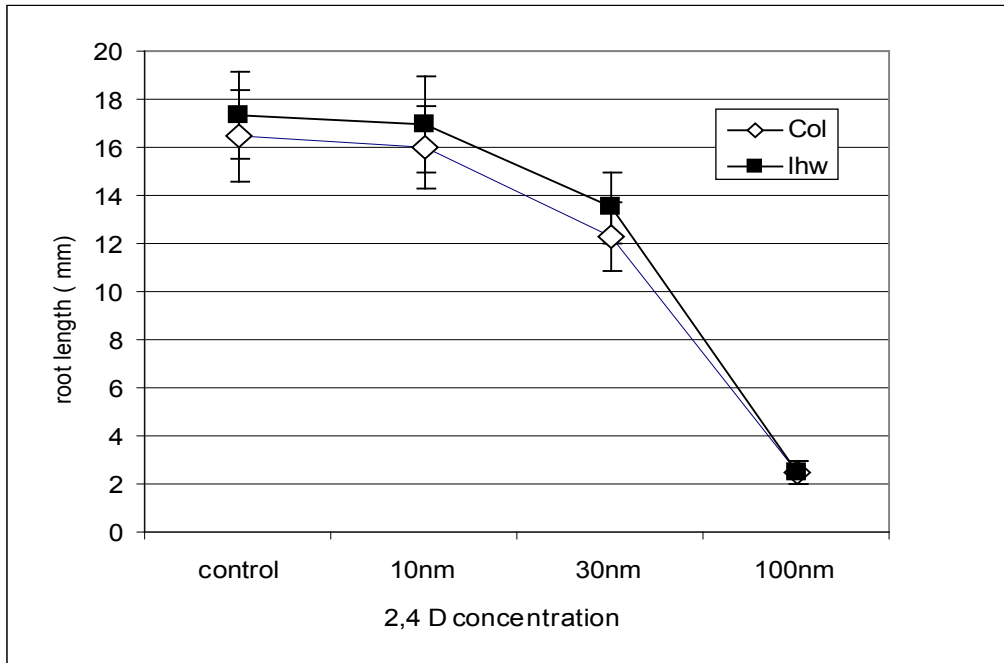

**Supplemental Figure 2: CLUSTAL W (1.83) multiple sequence alignment of LHW and relatives from Arabidopsis and Rice**

```

Os11g06010.1      --MAVGDALRRRLCEEVGSYAVFWKAIGAADPVHLVWEDGYCGHASCAGSDPSEALPTD 58
Os12g06330.1      --MAVGDALRRRLCEEARWSYAVFWKAIGAADPVHLVWEDGFCGHASCAGSEAS-----E 53
lhw                MGVLLREALRSMCVNNQWSYAVFWK-IGCQNSLLIWEECYNETESSNPRRLCG----- 54
At1g64625         -----
At1g06150         MGYTLQQLILRSICSNTDWNYSYAVFWKLNHH-SPMVLTLLEDVYCVNHERGLM-----P 50
At2g31280         MGSTSQEILKSFNFNTDWDYAVFWQLNHRGRSMVLTLEDAYYDHHG----- 46

Os11g06010.1      VGCAAAADTMTMCSLVNKVMASQVHVVEGTVGRAAFTGNHQWIIHGTAN---DHGIPSE 115
Os12g06330.1      AGCESGG---AVCTLVRKIMASQVHVVEGTVGRAAFTGNHQWIVHETAN---DHGLRSE 107
lhw                LGVDTQGNKQVQLLTNRMLNRIILVGEGLVGRAAFTGNHQWILANSFN---RDVHPPE 111
At1g64625         -----GNHQWLFSDTLFQWEHEFQNF 22
At1g06150         ESLHGGRRHAHDPLGLAVAKMSYHVHSLGEGIVGQVAISGQHQWIFSEYLN---DSHSTL 106
At2g31280         TNMHG---AHDPLGLAVAKMSYHVYSLGEGIVGQVAVSGEHQWVFPENYN---NCNSAF 99
                    * . * * * . .

Os11g06010.1      V-AAEMSYQFRVGIQTIAIIPVLPARGVLQLGSGTVVLENKSFMTTHAKKLCSQLNRRSSMA 174
Os12g06330.1      VVAEMNMQFRAGIKTIAIIPVLPARGVLQLGSGTVVILENISSVQYKLCQQLNRRSSMV 167
lhw                V-INEMLLQFSAGIQTVAVFPVPHGVLGSSLPIMENLGFVNDVKGLILQLG----- 164
At1g64625         LCGFKILIRQFTYTQTIAIIPVLPARGVLQLGSGTVVILENISTEILEQTTRALQETCLKP--- 79
At1g06150         QVHNGWESQISAGIKTILLVAVGSGGVVQLGSLCKVEEDPALVTHIRHLFLALTDPLAD- 165
At2g31280         EFHNWESQISAGIKTILLVAVGPGGVVQLGSLCKVNEVDVNFVNHIRHLFLALRDPLAD- 158
                    : . : * : . : . * * : * * * : * . : .

Os11g06010.1      VSSSVKNSSSQGRSRPLHGASNVQSTENRSKLFSPVPTCEQYNHPDTMAVSGSTSLNA 234
Os12g06330.1      ASASAKNDLSQKVQSRSLHLGPSIHP-----YEQCYGH DARALSSSTSANT 213
lhw                -----CVPG----- 168
At1g64625         -----
At1g06150         -----
At2g31280         -----

Os11g06010.1      CMNGSLKIAQLNGQAVREHIVYSKPDVRFIQV-YRDGQLGSNAQSI-----AMSSDLI 288
Os12g06330.1      GRNTSLLKVAQRNDQAIREQVLYA-PDMRFRQQLPYSDRRVDINTHSS-----AMSSGFI 267
lhw                -----ALLSENYRTY-----EPAADFI 185
At1g64625         -----HDSGDLDTLFEISLGDCEIFPAES-- 102
At1g06150         -----HASNLMQCDINSPDRPKIPSKCLH 190
At2g31280         -----HAANLRQCNMNNLSLCLKMPSEGLH 183
                    . . :

Os11g06010.1      SSSLRSVQKQPLLMNINSQLEYGDGAETSADLRKNVLLKPPVCLDPFIHDR-NINISHGI 347
Os12g06330.1      SSISASVEKYPLLTNNIGQVEHGNMEESSG--PRNVLLKLSLSCRNPVVENTNTSLFHHG 325
lhw                G----- 186
At1g64625         -----
At1g06150         -EASPDFSG----- 198
At2g31280         AEAFPCDSCG----- 192

Os11g06010.1      TEVSNVINDHGNFDFLSGGARVVRANLCTSATS-QVLDRRSHSVSGMLLHREPVSCEVP 406
Os12g06330.1      DEVPAFLNSHGSFDFLQAGRPVVEANLYNNGTSSQVLDQRCSSTSGMAGY-KPSVSYKFP 384
lhw                VPVSRIIPSQ-----GHKILQSSAFVAETSKQHFNSTGSSDHQMVEE----- 228
At1g64625         -----FQGFSDDDIFAEDNPPSLLSPEMISSEAASSN----- 134
At1g06150         -EFDKAMDMEGLNIVSQNTSNRSDLPYNTPTTYFHMERTAQVIGGLEAVQPSMFGSND 257
At2g31280         -EVDKAMDVEESNILTQYKTRRSDSMPYNTPSCLVMEKAAQVVGREVVQGSTCGSYSG 251
                    . :

Os11g06010.1      QSSEFSTKMGSLERGSFQISSAPSSSEDVQISNGLNTSISRENQLSVSNHICDQDKINGV 466
Os12g06330.1      HSAQFIVKMENPRRQSFQDPAAPSSGSDVQVSSGLKTTTRQFN---PEHMCQNKKTNEV 440
lhw                ----SPCNLVDEHEGGWQSTTGFLTAGEVAVPS-----NPDWL 263
At1g64625         -----QDLTNGDDYGFIDILQSYS-----L 153
At1g06150         VTSGFSVGVVDTKHKNQVDISDMSKVIYDEETGGYRYSRELDPN---FQHYSRNHVRNSG 314
At2g31280         VTFGFPVDLVGAKHENQVGTNIIRDAPHVGMTSGCKDSRDLDPN---LHLYMKNHVLNLT 308
                    : .

Os11g06010.1      NDLSATLSTERMNMMDGCKPPGLSLERTSPLFMEQSVENDLFDILGPQFHHLCHNAGADL 526
Os12g06330.1      NDSSAAVSTQDVKNMDRHKILDISNERTSSFFVMDPSTENDLFDIFGTDFHQLHRSLDGDL 500

```
